# Supplementary material for: Ectopic pancreas formation in Hes1-knockout mice reveals plasticity of endodermal progenitors of the gut, bile duct, and pancreas
Source: JCI journal article supplement (doi:10.1172/jci27704), 2006-05-18
Supplement: sd1 [file 1]

Figure S1. Fukuda et al

*Hes1*<sup>-/-</sup>; *Ptf1a*<sup>cre/+</sup>; *R26r* e11.5 (stomach)

Glucagon

X-gal

X-gal/Glucagon

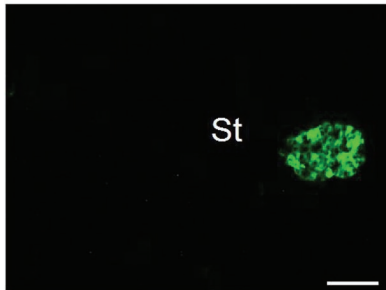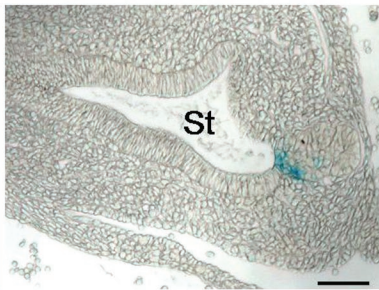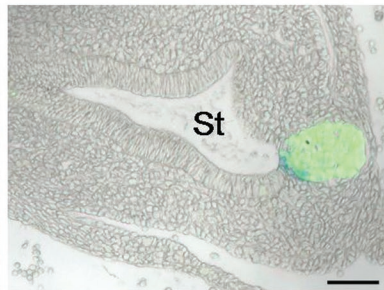

## Supplemental Figure legend

### Supplemental Figure 1. Early glucagon+ cells in the ectopic pancreatic bud of *Hes1*<sup>-/-</sup>; *Ptfla*<sup>cre/wt</sup>; *ROSA26r* mice

The evaginated cells include *Ptfla*-lineage-labeled cells and *Ptfla*-lineage-negative early glucagon+ cells in the ectopic pancreatic bud in the distal stomach of *Hes1*<sup>-/-</sup>; *Ptfla*<sup>cre/wt</sup>; *ROSA26r* mice at e11.5. St, stomach. Scale bars: 50 μm.
